# Supplementary material
Source: PubMed Central journal article supplement (PMC3748216)
Supplement: NIHMS441279-supplement-01.pdf [file NIHMS441279-supplement-01.pdf]

**Table S1. Medical Characteristics of d-TGA Subjects (N=49) from Whom DTI Data Was Acquired at 16 Years of Age**

| Variable                                                       | Minimum | 25 <sup>th</sup> percentile | Median  | 75 <sup>th</sup> percentile | Maximum |
|----------------------------------------------------------------|---------|-----------------------------|---------|-----------------------------|---------|
| <b>Preoperative characteristics</b>                            |         |                             |         |                             |         |
| Apgar score at 1 min                                           | 2       | 7                           | 8       | 8                           | 9       |
| Apgar score at 5 min                                           | 5       | 8                           | 8       | 9                           | 9       |
| VSD diagnosis, N (%)                                           |         |                             | 11 (22) |                             |         |
| Age at surgery, days                                           | 2       | 4                           | 6       | 9                           | 61      |
| Low-flow treatment group, N (%)                                |         |                             | 26 (53) |                             |         |
| <b>Operative characteristics</b>                               |         |                             |         |                             |         |
| Total cooling duration, min                                    | 10      | 13                          | 15      | 20                          | 50      |
| Duration of deep hypothermic circulatory arrest, min           | 5       | 18                          | 41      | 56                          | 72      |
| Total support time, min                                        | 116     | 133                         | 140     | 156                         | 203     |
| Total bypass time, min                                         | 63      | 85                          | 108     | 127                         | 185     |
| Lowest tympanic temperature during surgery, °C                 | 12.0    | 12.2                        | 14.5    | 15.5                        | 17.5    |
| <b>Postoperative characteristics</b>                           |         |                             |         |                             |         |
| Definite clinical or EEG seizures, N (%)                       |         |                             | 4 (8)   |                             |         |
| Days intubated                                                 | 1.3     | 2.0                         | 2.8     | 3.9                         | 28.5    |
| Days in cardiac intensive care unit                            | 3       | 4                           | 5       | 6                           | 43      |
| Days in hospital                                               | 6       | 7                           | 8       | 11                          | 64      |
| <b>Interim medical history after arterial switch operation</b> |         |                             |         |                             |         |
| Total number of cardiac operations                             | 0       | 0                           | 0       | 0                           | 3       |
| Total number of open operations                                | 0       | 0                           | 0       | 0                           | 2       |
| Total number of closed operations                              | 0       | 0                           | 0       | 0                           | 2       |
| Total number of catheterizations                               | 0       | 1                           | 1       | 1                           | 5       |

d-TGA indicates d-transposition of the great arteries; DTI, diffusion tensor imaging; VSD, ventricular septal defect; EEG, electroencephalography.
